# Supplementary material for: Current Perspectives on Augmented Reality and Head-Mounted Displays in Endoscopy: A Scoping Review
Source: Research Square preprint supplement (doi:10.21203/rs.3.rs-8098102/v1), 2025-11-26
Supplement: Supplementary file 1 [file 2c3364ec5ebc998d052c6e15.docx]

**Web of Science:**

(TI=(*scopy OR *scope OR *scopic))

AND

(TI=(HMD OR "head mounted" OR "head-mounted" OR "wearable display" OR "headset" OR "goggle")

OR KP=(HMD OR "head mounted" OR "head-mounted" OR "wearable display" OR "headset" OR "goggle")

OR AB=(HMD OR "head mounted" OR "head-mounted" OR "wearable display" OR "headset" OR "goggle"))

AND

(TI=("AR" OR "augmented reality" OR "XR" OR "mixed reality" OR "holograph*")

OR KP=("AR" OR "augmented reality" OR "XR" OR "mixed reality" OR "holograph*")

OR AB=("AR" OR "augmented reality" OR "XR" OR "mixed reality" OR "holograph*"))

**Scopus:**

(TITLE( *scopy OR *scope OR *scopic ))

AND

(TITLE(HMD OR "head mounted" OR "head-mounted" OR "wearable display" OR "headset" OR "goggle")

OR ABS(HMD OR "head mounted" OR "head-mounted" OR "wearable display" OR "headset" OR "goggle")

OR KEY(HMD OR "head mounted" OR "head-mounted" OR "wearable display" OR "headset" OR "goggle"))

AND

(TITLE("AR" OR "augmented reality" OR "XR" OR "mixed reality" OR "holograph*")

OR ABS("AR" OR "augmented reality" OR "XR" OR "mixed reality" OR "holograph*")

OR KEY("AR" OR "augmented reality" OR "XR" OR "mixed reality" OR "holograph*"))

**PubMed:**

((endoscop* OR laparoscop* OR bronchoscop* OR thoracoscop* OR gastroscop* OR colonoscop*))

AND

((HMD[Title/Abstract] OR "head mounted"[Title/Abstract] OR "head-mounted"[Title/Abstract]

OR "wearable display"[Title/Abstract] OR "headset"[Title/Abstract] OR "goggle"[Title/Abstract]))

AND

(("AR"[Title/Abstract] OR "augmented reality"[Title/Abstract] OR "XR"[Title/Abstract] OR "mixed reality"[Title/Abstract] OR "holograph*"[Title/Abstract]))

**IEEE Xplore:**

(("scopy" OR "scope" OR "scopic"))

AND

(("HMD" OR "head mounted" OR "head-mounted" OR "wearable display" OR "headset" OR "goggle"))

AND

(("AR" OR "augmented reality" OR "XR" OR "mixed reality" OR "3D" OR "holograph"))
